# Supplementary material
Source: publisher site journal article supplement (https://www.dovepress.com/article/358471)

Supplementary Materials

**Figure Legends**

**Figure S1** The GO enrichment analysis of trans_targets of ElncRNAs. **(A)** Enrichment of BP of trans_targets. **(B)** Enrichment of CC of trans_targets. (**C**) Enrichment of MF of trans_targets.

**Figure S2** The KEGG analysis of trans_targets of ElncRNAs. **(A)** The enrichment of pathways of trans_targets. **(B)** The whole analyses of trans_targets. The whole outlook of enriched pathways, including cellular process, environmental processing, genetic information processing, human diseases and original systems, of trans_targets.

**Figure S1**

**
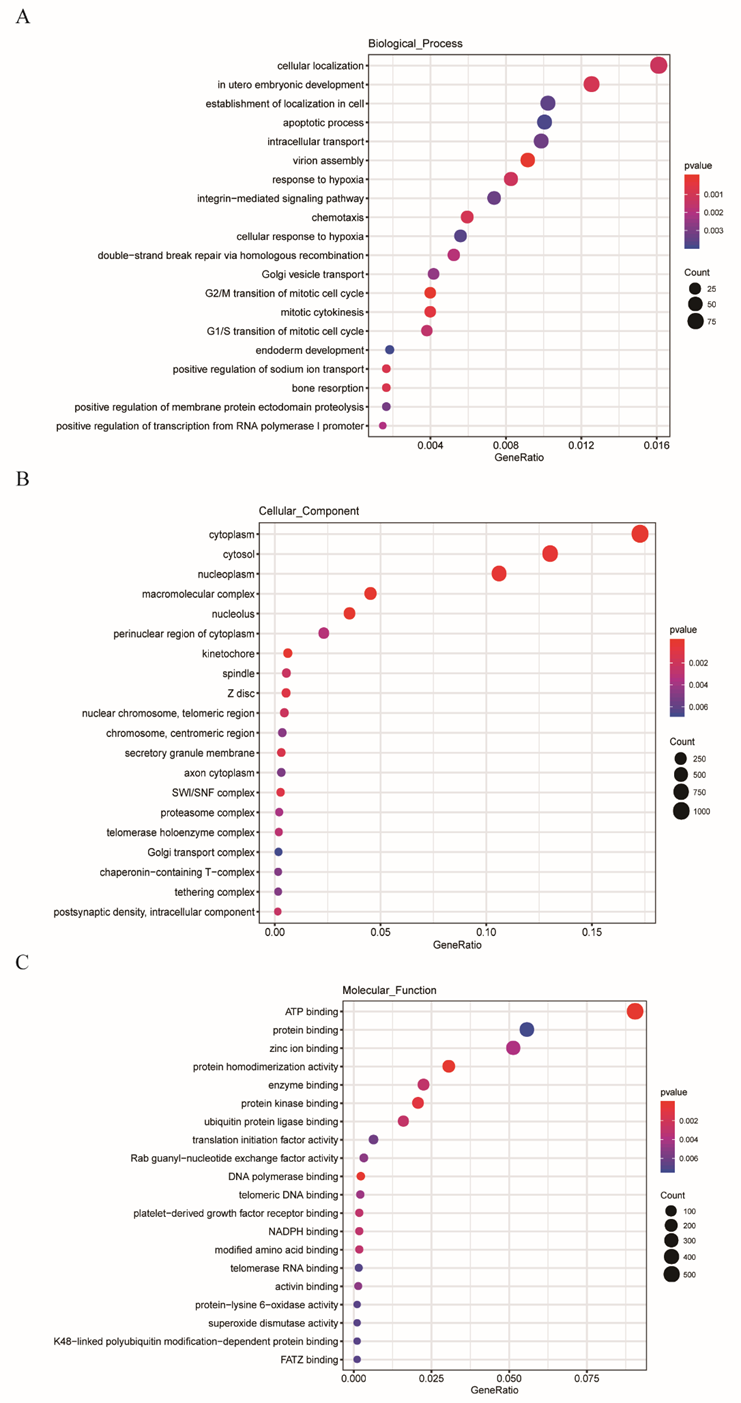
**

**Figure S2**


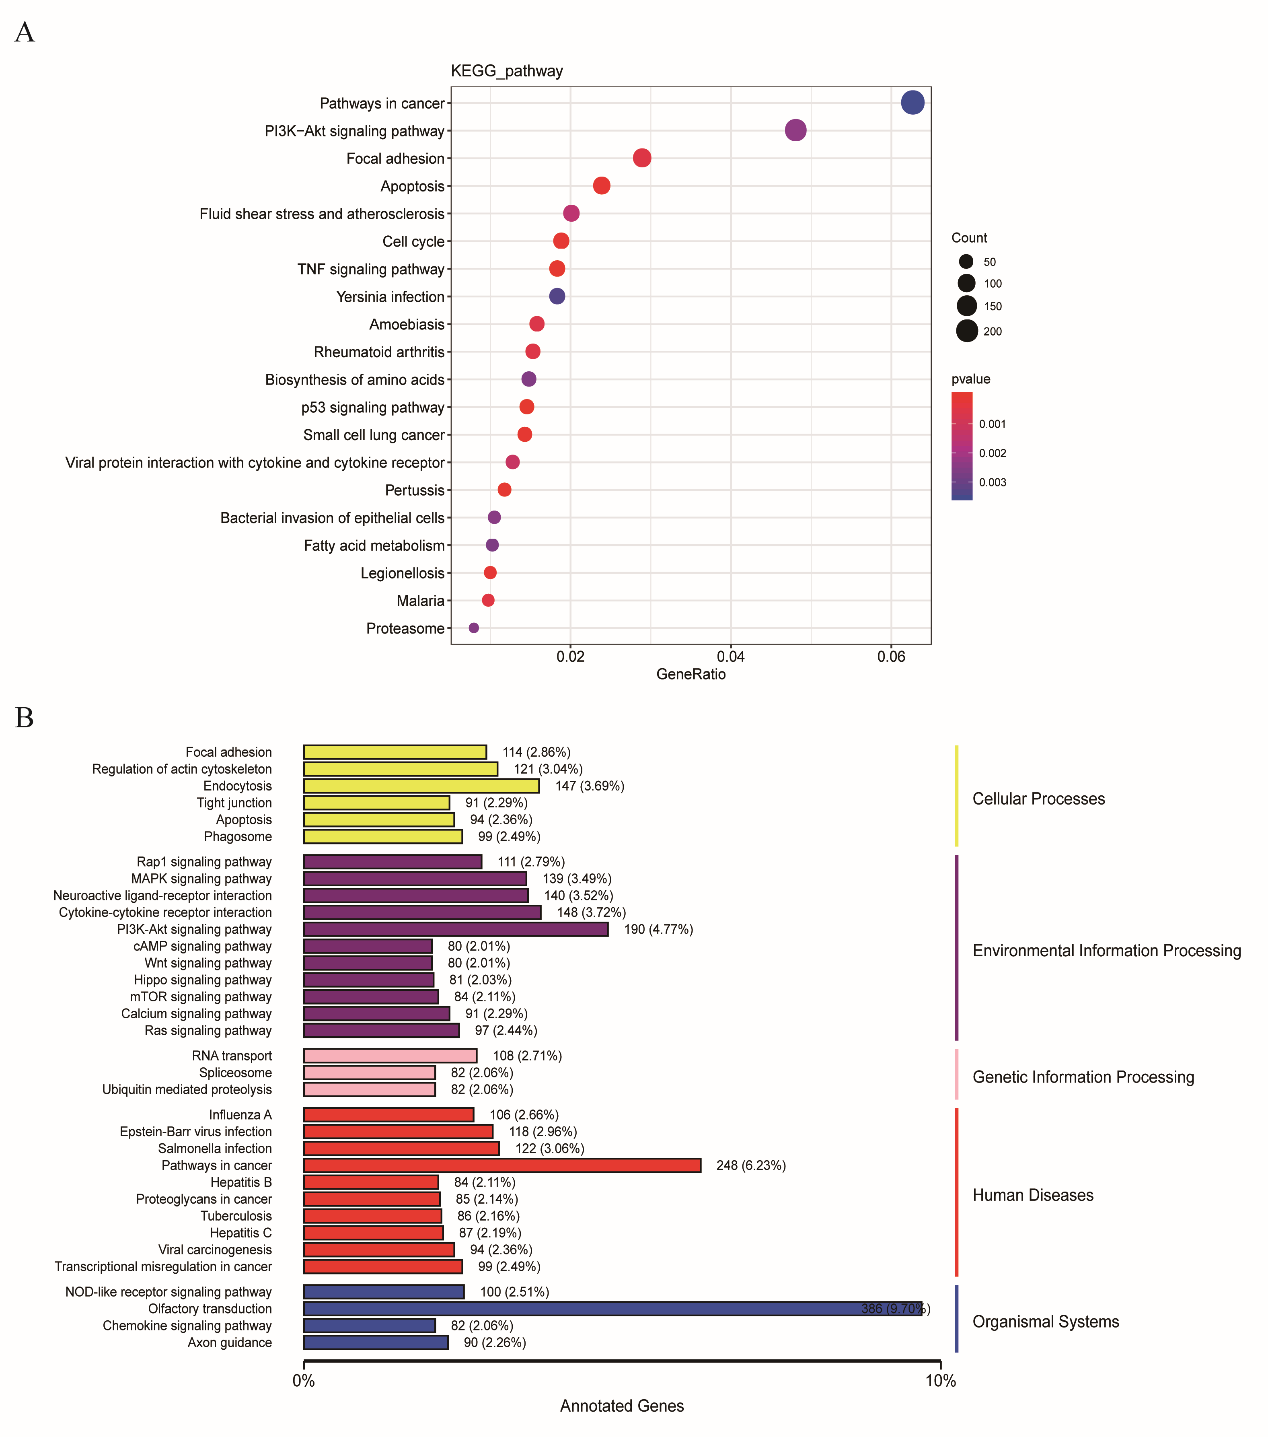

Supplement: Supplementary file 1 [file get_supplementary_file.php]
